# Supplementary material for: Relationship of age, atherosclerosis and angiographic stenosis using artificial intelligence
Source: HighWire-hosted journal article supplement (doi:10.1136/openhrt-2021-001832), 2021-11-01
Supplement: openhrt-2021-001832supp001_data_supplement.pdf [file openhrt-2021-001832supp001_data_supplement.pdf]

**Appendix A.** Participating Sites and Enrolling Investigators**Investigator:** Hugo Marques, MD

Nova Medical School - Faculdade de Ciências Médicas,  
Lisboa, Portugal

**Investigator:** Hyuk-Jae Chang, MD PhD<sup>3</sup>

Severance Cardiovascular Hospital and Severance Biomedical Science Institute,  
Yonsei University College of Medicine, Yonsei University Health System  
Seoul, South Korea

**Investigator:** Jung Hyun Choi, MD PhD

Pusan National University Hospital  
Busan, South Korea

**Investigator:** Joon-Hyung Doh, MD

University Ilsan Paik Hospital  
Goyang, South Korea

**Investigator:** Ae-Young Her, MD

Kang Won National University Hospital  
Chuncheon, South Korea

**Investigator:** Bon-Kwon Koo, MD PhD

Seoul National University Hospital  
Seoul, South Korea

**Investigator:** Chang-Wook Nam, MD PhD

Keimyung University Dongsan Hospital  
Daegu, South Korea

**Investigator:** Hyung-Bok Park, MD

International St. Mary's Hospital  
Catholic Kwandong University College of Medicine  
Incheon, South Korea

**Investigator:** Sang-Hoon Shin, MD

Ewha Women's University Seoul Hospital

Seoul, South Korea

**Investigator:** Jason Cole, MD

Mobile Cardiology Associates  
Mobile, Alabama, USA

**Investigator:** Alessia Gimelli, MD

Fondazione Toscana Gabriele Monasterio  
Pisa, Italy

**Investigator:** Muhammad Akram Khan, MD

Cardiac Center of Texas  
McKinney, Texas, USA

**Investigator:** Bin Lu, MD, Yang Gao, MD

State Key Laboratory of Cardiovascular Disease  
Fuwai Hospital  
Beijing, China

**Investigator:** Faisal Nabi, MD

Houston Methodist Hospital  
Houston, Texas, USA

**Investigators:** Ryo Nakazato, MD

St. Luke's International Hospital  
Tokyo, Japan

**Investigator:** U. Joseph Schoepf, MD

Medical University of South Carolina  
Charleston, SC, USA

**Investigators:** Roel S. Driessen, MD, Michiel J. Bom, MD, Paul Knaapen, MD, PhD,  
Guus A. de Waard, MD

Amsterdam University Medical Center  
VU University Medical Center  
Amsterdam, the Netherlands

**Investigator:** Randall Thompson, MD

St. Luke's Mid America Heart Institute

Kansas City, MO, USA

**Investigator:** James J. Jang, MD

Kaiser Permanente Hospital  
Oakland, CA, USA

**Investigator:** Michael Ridner, MD

Heart Center Research, LLC  
Huntsville, Alabama, USA

**Investigator:** Chris Rowan, MD

Renown Heart and Vascular Institute  
Reno, NV, USA

**Investigator:** Erick Avelar, MD

Oconee Heart and Vascular Center at St Mary's Hospital  
Athens, GA, USA

**Investigator:** Philippe G n reux, MD

Gagnon Cardiovascular Institute  
Morristown Medical Center  
Morristown, NJ, USA

**Investigators:** Gianluca Pontone, MD, PhD & Daniele Andreini, MD, PhD

Centro Cardiologico Monzino, IRCCS  
Milan, Italy
