# Supplementary material for: Relationship of age, atherosclerosis and angiographic stenosis using artificial intelligence
Source: HighWire-hosted journal article supplement (doi:10.1136/openhrt-2021-001832), 2021-11-01
Supplement: openhrt-2021-001832supp003_data_supplement.pdf [file openhrt-2021-001832supp003_data_supplement.pdf]

## APPENDIX C

## Per-Patient and Per-Lesion APCs by for Non-Obstructive vs Obstructive Plaque in Age &lt; 65 and Age ≥ 65 CCTA, Angiographic Stenosis

| Variable<br>Per Patient, mean (SD) | Age <65                       |                           |         | Age ≥65                        |                           |         |
|------------------------------------|-------------------------------|---------------------------|---------|--------------------------------|---------------------------|---------|
|                                    | Non-obstructive (<50%) (N=62) | Obstructive (≥50%) (N=77) | P-Value | Non-obstructive (<50%) (N=66)  | Obstructive (≥50%) (N=98) | P-Value |
| PV, mm <sup>3</sup>                | 357.5 (379.3)                 | 500.1 (349.8)             | 0.00229 | 510.7 (206.2)                  | 792.7 (486.1)             | 0.0004  |
| LD-NCP, mm <sup>3</sup>            | 8.6 (11.1)                    | 15.0 (15.3)               | 0.0046  | 8.9 (12.9)                     | 12.4 (15.8)               | 0.14    |
| NCP, mm <sup>3</sup>               | 243.0 (220.2)                 | 352.1 (266.8)             | 0.0107  | 286.5 (190.2)                  | 426.2 (262.7)             | 0.0001  |
| CP, mm <sup>3</sup>                | 114.5 (190.5)                 | 148.0 (187.5)             | 0.30    | 224.2 (372.1)                  | 366.5 (336.2)             | 0.01    |
| % Plaque Calcified                 | 25.3 (21.3)                   | 26.6 (21.3)               | 0.56    | 33.9 (22.4)                    | 42.5 (20.5)               | 0.01    |
| Remodeling Index                   | 1.30 (0.20)                   | 1.38 (0.23)               | 0.04    | 1.35 (0.21)                    | 1.40 (0.22)               | 0.14    |
| Positive Remodeling >1.1, n (%)    | 48 (79%)                      | 67 (88.2%)                | 0.09    | 55 (83%)                       | 88 (90%)                  | 0.29    |
| Intermediate Remodeling, n(%)      | 10 (16%)                      | 9 (12%)                   |         | 10 (15%)                       | 10 (10%)                  |         |
| Negative Remodeling, n (%)         | 3 (5%)                        | 0                         |         | 1 (2%)                         | 0                         |         |
| HRP (LD-NCP+PR), n(%)              | 43 (69%)                      | 61 (79%)                  | 0.18    | 51 (77%)                       | 79 (81%)                  | 0.60    |
| Lesion Length, mm                  | 23.5 (13.7)                   | 28.7 (14.8)               | 0.03    | 31.9 (21.1)                    | 37.6 (19.6)               | 0.07    |
| Variable<br>Per Lesion             | Non-obstructive (<50%) (N=71) | Obstructive (≥50%) (N=77) | P-Value | Non-obstructive (<50%) (N=116) | Obstructive (≥50%) (N=98) | P-Value |
| Plaque volume, mm <sup>3</sup>     | 60.5 (79.8)                   | 103.8 (134.5)             | 0.01    | 105.6 (140.5)                  | 109.7 (131.4)             | 0.81    |
| LD-NCP, mm <sup>3</sup>            | 1.6 (3.1)                     | 4.2 (8.2)                 | 0.01    | 2.0 (6.6)                      | 2.6 (10.0)                | 0.60    |
| NCP, mm <sup>3</sup>               | 38.4 (50.8)                   | 74.6 (108.1)              | 0.0036  | 56.2 (75.8)                    | 61.5 (85.8)               | 0.51    |
| CP, mm <sup>3</sup>                | 22.1 (39.1)                   | 29.2 (51.5)               | 0.69    | 49.4 (86.8)                    | 48.2 (72.7)               | 0.87    |
| Remodeling Index                   | 1.13 (0.20)                   | 1.10 (0.28)               | 0.15    | 1.06 (0.21)                    | 1.05 (0.28)               | 0.71    |
| Positive Remodeling >1.1, n(%)     | 29 (41%)                      | 25 (33%)                  | 0.15    | 34 (29%)                       | 29 (30%)                  | 0.11    |
| Intermediate Remodeling, n(%)      | 28 (39%)                      | 26 (34%)                  |         | 46 (40%)                       | 27 (28%)                  |         |
| Negative Remodeling, n(%)          | 14 (20%)                      | 26 (34%)                  |         | 36 (31%)                       | 42 (43%)                  |         |
| HRP (LD-NCP+PR), n(%)              | 34 (48%)                      | 31 (40%)                  | 0.38    | 42 (36%)                       | 33 (34%)                  | 0.67    |
| Lesion Length, mm                  | 13.9 (10.4)                   | 18.3 (15.5)               | 0.03    | 18.1 (15.6)                    | 18.2 (15.1)               | 0.96    |

Abbreviations: PV = plaque volume; PAV = percent atheroma volume; LD-NCP = low-density non-calcified plaque; NCP = non-calcified plaque; CP = calcified plaque; PR = positive remodeling; HRP = High-risk plaque
